# Supplementary material for: The Osmoprotectant Switch of Potassium to Compatible Solutes in an Extremely Halophilic Archaea Halorubrum kocurii 2020YC7
Source: MDPI journal article supplement (doi:10.3390/genes13060939), 2022-05-24
Supplement: s1 [file s1]

**Table S1** Primer sequences of osmoadaptive genes

| Gene Name                  | Primer Sequences                                          |
|----------------------------|-----------------------------------------------------------|
| <i>TrkH</i>                | F: CGGCTTTATCCTCTTTGAC<br>R: CGAAGTCCCTGATAAGCGA          |
| <i>TrkA</i>                | F: CCCC GCGTTGTAGAGAAAG<br>R: TCGAAGACGGTGACGTAAT         |
| <i>Kch</i>                 | F: TGGGTGACCGTCAGAGCAT<br>R: GGTTAGCGGGAGCAGTATC          |
| <i>KefB</i>                | F: CGACGGAGTACAACCACGAGATC<br>R: GAGCCCGATCCAGAAGAAGAACAC |
| <i>TreS</i>                | F: FGCTGTTCAAAGAGATGCGG<br>R: CCGCAGGAAGTTCACCCAG         |
| BCCT family transport gene | F: TTCCTGCTCTTGCTGGGTT<br>R: ATGCGGGCAATGAACAGTC          |
| <i>SugA</i>                | F: TCTACGAAGAGGCGGATGC<br>R: GGGAAGCGTGTCGTAGATA          |
| <i>16s</i>                 | F: CAGCCCACAATCCGA ACTA<br>R: GAGACCCGCATCCTTACTT         |
